# Supplementary material
Source: ML conference proceedings conference paper supplement (https://openaccess.thecvf.com/content/WACV2025/html/Cho_Feature_Augmentation_Based_WACV_2025_paper.html)
Supplement: Supplementary file 1 [file Cho_Feature_Augmentation_Based_WACV_2025_supplemental.pdf]

# Feature Augmentation based Test-Time Adaptation

## Supplementary Material

Younggeol Cho\*    Youngraek Kim\*    Junho Yoon    Seunghoon Hong    Dongman Lee  
 KAIST

{rangewing, youngraek.kim, vpdtrldl, seunghoon.hong, dlee}@kaist.ac.kr

Due to the limited space of the main paper, we provide more experimental results and implementation details in the supplementary material.

**Accuracy of pseudo-labels.** Fig. A shows the accuracy of pseudo-labels as the model adapts. The pseudo-label accuracy is high compared to the output accuracy and improves over time.

**Further experimental results.** We present the full results of Tab. 4, Tab. 5, and Tab. 7 in the main paper, as shown in Tab. A, Tab. B, and Tab. C, respectively.

**Implementation details.** We provide the full data of the hyperparameters in Tab. D.

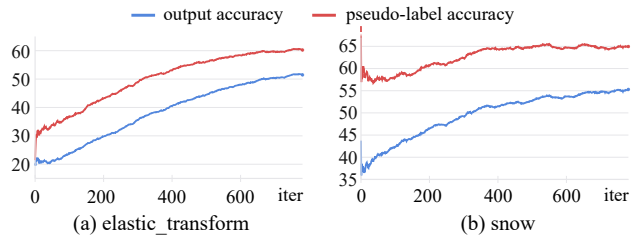

Figure A. Pseudo-label accuracy (%) on ImageNet-C. We use DeYO+FATA with ResNet50-GN for this experiment. Exponential moving average ( $p = 0.99$ ) is applied.

| Method    | Ar→Cl | Ar→Pr | Ar→Re | Cl→Ar | Cl→Pr | Cl→Re | Pr→Ar | Pr→Cl | Pr→Re | Re→Ar | Re→Cl | Re→Pr | Average | ΔPerf. |
|-----------|-------|-------|-------|-------|-------|-------|-------|-------|-------|-------|-------|-------|---------|--------|
| No Adapt  | 41.31 | 64.74 | 74.75 | 51.71 | 60.94 | 63.58 | 51.3  | 37.21 | 73.63 | 64.94 | 40.25 | 75.85 | 58.35   |        |
| MEMO [8]  | 42.18 | 65.65 | 75.03 | 49.94 | 60.26 | 62.82 | 50.31 | 37.25 | 72.44 | 64.81 | 40.37 | 76.73 | 58.15   |        |
| TENT [6]  | 41.4  | 64.74 | 74.75 | 51.71 | 60.89 | 63.64 | 51.3  | 37.16 | 73.65 | 65.02 | 40.21 | 75.87 | 58.36   |        |
| CoTTA [7] | 41.28 | 64.79 | 71.86 | 51.71 | 60.91 | 63.6  | 51.3  | 37.21 | 72.11 | 64.94 | 40.3  | 70.87 | 57.57   |        |
| EATA [3]  | 41.99 | 64.83 | 74.87 | 51.71 | 60.96 | 63.64 | 51.42 | 37.82 | 73.67 | 65.1  | 41.03 | 75.94 | 58.58   |        |
| EATA+FATA | 42.2  | 65.74 | 74.39 | 53.61 | 61.66 | 65.34 | 53.61 | 39.11 | 74.27 | 67.08 | 43.09 | 76.41 | 59.71   | +1.13  |
| SAR [4]   | 41.37 | 64.77 | 74.78 | 51.67 | 60.91 | 63.64 | 51.34 | 37.14 | 73.63 | 65.02 | 40.25 | 75.87 | 58.37   |        |
| SAR+FATA  | 42.02 | 64.63 | 74.73 | 53.32 | 61.59 | 64.82 | 51.63 | 38.72 | 73.88 | 65.51 | 42.47 | 76.82 | 59.18   | +0.81  |
| DeYO [2]  | 41.63 | 64.7  | 74.71 | 51.96 | 61.07 | 63.87 | 51.34 | 37.71 | 73.74 | 65.1  | 40.62 | 76.3  | 58.56   |        |
| DeYO+FATA | 41.74 | 64.97 | 74.73 | 51.96 | 61.34 | 63.99 | 51.55 | 37.73 | 73.74 | 64.94 | 40.82 | 76.19 | 58.64   | +0.08  |

Table A. Image classification results on Office-Home [5]. ResNet50 with GN is used for this experiment. We use the accuracy (%) as the metric. ΔPerf. is the performance gap between the original method and another version where our method is incorporated.

| Method              | Noise  |       |        | Blur   |       |        |       | Weather |       |       |       | Digital |         |       |       | Avg.  |
|---------------------|--------|-------|--------|--------|-------|--------|-------|---------|-------|-------|-------|---------|---------|-------|-------|-------|
|                     | Gauss. | Shot  | Impul. | Defoc. | Glass | Motion | Zoom  | Snow    | Frost | Fog   | Brit. | Contr.  | Elastic | Pixel | JPEG  |       |
| No Adapt            | 17.98  | 19.84 | 17.88  | 19.75  | 11.35 | 21.42  | 24.92 | 40.43   | 47.30 | 33.59 | 69.28 | 36.27   | 18.61   | 28.40 | 52.28 | 30.62 |
| DeYO [2]            | 39.46  | 41.90 | 41.03  | 22.27  | 24.11 | 38.48  | 37.87 | 50.51   | 49.59 | 1.43  | 73.17 | 49.95   | 41.54   | 55.96 | 57.82 | 41.67 |
| DeYO+FATA (Layer 0) | 35.58  | 38.56 | 36.51  | 20.32  | 17.61 | 41.07  | 40.53 | 48.89   | 48.40 | 54.22 | 71.25 | 49.74   | 8.08    | 55.29 | 56.76 | 41.52 |
| DeYO+FATA (Layer 1) | 39.84  | 42.11 | 40.47  | 21.84  | 23.68 | 39.93  | 41.17 | 55.03   | 50.82 | 1.09  | 72.86 | 51.13   | 39.57   | 57.26 | 57.97 | 42.32 |
| DeYO+FATA (Layer 2) | 39.72  | 42.77 | 41.03  | 21.44  | 23.04 | 39.74  | 42.76 | 54.51   | 52.04 | 0.84  | 73.57 | 51.67   | 45.92   | 57.89 | 58.16 | 43.01 |
| DeYO+FATA (Layer 3) | 39.71  | 42.49 | 41.37  | 22.29  | 24.46 | 38.90  | 38.31 | 51.23   | 50.02 | 56.31 | 73.19 | 50.03   | 42.10   | 55.99 | 57.79 | 45.61 |

Table B. Ablation study on the position of feature augmentation. ResNet50 with GN is used for this experiment.

| DeYO | Augmentation loss | Noise        |              |              | Blur         |              |              |              | Weather      |              |              |              | Digital      |              |              |              | Avg.         |
|------|-------------------|--------------|--------------|--------------|--------------|--------------|--------------|--------------|--------------|--------------|--------------|--------------|--------------|--------------|--------------|--------------|--------------|
|      |                   | Gauss.       | Shot         | Impul.       | Defoc.       | Glass        | Motion       | Zoom         | Snow         | Frost        | Fog          | Brit.        | Contr.       | Elastic      | Pixel        | JPEG         |              |
| -    | -                 | 17.98        | 19.84        | 17.88        | 19.75        | 11.35        | 21.42        | 24.92        | 40.43        | 47.30        | 33.59        | 69.28        | 36.27        | 18.61        | 28.40        | 52.28        | 30.62        |
| -    | FATA loss (Ours)  | 37.92        | 39.99        | 38.70        | <b>25.96</b> | 22.21        | 36.06        | 37.77        | <b>51.99</b> | <b>51.33</b> | 2.85         | 73.11        | 48.83        | 13.10        | 53.78        | 56.73        | 39.35        |
| ✓    | -                 | <u>39.46</u> | <u>41.90</u> | <u>41.03</u> | 22.27        | <u>24.11</u> | <u>38.48</u> | <u>37.87</u> | 50.51        | 49.59        | 1.43         | <u>73.17</u> | <u>49.95</u> | <u>41.54</u> | <u>55.96</u> | <b>57.82</b> | 41.67        |
| ✓    | Simple Aug.       | 38.19        | 41.31        | 39.31        | 21.64        | 23.43        | 36.96        | 34.93        | 48.72        | 46.50        | 1.14         | 72.90        | 49.19        | 37.43        | 55.39        | 57.39        | 40.30        |
| ✓    | MSE loss          | 0.22         | 0.46         | 0.57         | 0.88         | 0.89         | 0.57         | 2.15         | 2.00         | 7.49         | 8.18         | 61.78        | 6.37         | 0.83         | 2.19         | 3.52         | 6.54         |
| ✓    | FATA Loss (Ours)  | <b>39.71</b> | <b>42.49</b> | <b>41.37</b> | <u>22.29</u> | <b>24.46</b> | <b>38.90</b> | <b>38.31</b> | <u>51.23</u> | <u>50.02</u> | <b>56.31</b> | <b>73.19</b> | <b>50.03</b> | <b>42.10</b> | <b>55.99</b> | <u>57.79</u> | <b>45.61</b> |

Table C. Ablation study on the augmentation loss. ResNet50 with GN is used for this experiment.

| Parameter       | Meaning                                         | Value                                                                                                                  |
|-----------------|-------------------------------------------------|------------------------------------------------------------------------------------------------------------------------|
| $i$             | Layer to inject the feature augmentation        | 3 (ResNet50), 11 (ViT-B)                                                                                               |
| $E_0$           | Entropy threshold for sample filtering          | $0.5 \ln C$                                                                                                            |
| $E_\omega$      | Normalization factor for sample weighting       | $0.4 \ln C$                                                                                                            |
| $\sigma_n$      | Standard deviation for the noise                | 1.0                                                                                                                    |
| $\lambda_{EMA}$ | Smoothing factor for exponential moving average | 0.95                                                                                                                   |
| $B$             | Default batch size                              | 64                                                                                                                     |
| $\eta$          | Learning rate                                   | 0.0005 (ResNet50, $B = 64$ )<br>0.001 (ViT-B, $B = 64$ )<br>0.00025 (ResNet50, $B = 1$ )<br>0.000016 (ViT-B, $B = 1$ ) |

Table D. Hyperparameters for the experiment.

**Rationale for replacing variance with standard deviation in Eq. (3).** Eq. (3) is derived from Normalization Perturbation (NP) [1], which is formulated as follows:

$$\mathbf{z}' = \alpha \sigma_c \cdot \frac{\mathbf{z} - \mu_c}{\sigma_c} + \beta \mu_c = \alpha \mathbf{z} + (\beta - \alpha) \mu_c, \quad (\text{A})$$

where  $\alpha, \beta \in \mathbb{R}^{B \times C}$  are the random noises sampled from  $N(\mathbf{I}, \sigma_n \mathbf{I})$ ,  $\mu_c, \sigma_c$  are the channel-wise feature mean and standard deviation, respectively. As formulated by Eq. (3), NP+ introduces the term  $\delta = \text{Var}(\mu_c) / \max(\text{Var}(\mu_c))$  to control the magnitude of the noises  $\alpha$  and  $\beta$ . We replace variance with standard deviation because the noises are related to standard deviation  $\sigma_c$ , not variance, as shown in Eq. (A).

## References

- [1] Qi Fan, Mattia Segu, Yu-Wing Tai, Fisher Yu, Chi-Keung Tang, Bernt Schiele, and Dengxin Dai. Towards robust object detection invariant to real-world domain shifts. In *The Eleventh International Conference on Learning Representations*, 2023. 2
- [2] Jonghyun Lee, Dahuin Jung, Saehyung Lee, Junsung Park, Juhyeon Shin, Uiwon Hwang, and Sungroh Yoon. Entropy is not enough for test-time adaptation: From the perspective of disentangled factors. In *The Twelfth International Conference on Learning Representations*, 2024. 1
- [3] Shuaicheng Niu, Jiaxiang Wu, Yifan Zhang, Yafo Chen, Shijian Zheng, Peilin Zhao, and Mingkui Tan. Efficient test-time model adaptation without forgetting. In *International conference on machine learning*, pages 16888–16905. PMLR, 2022. 1
- [4] Shuaicheng Niu, Jiaxiang Wu, Yifan Zhang, Zhiquan Wen, Yafo Chen, Peilin Zhao, and Mingkui Tan. Towards stable test-time adaptation in dynamic wild world. In *The Eleventh International Conference on Learning Representations*, 2023. 1
- [5] Hemanth Venkateswara, Jose Eusebio, Shayok Chakraborty, and Sethuraman Panchanathan. Deep hashing network for unsupervised domain adaptation. In *Proceedings of the IEEE conference on computer vision and pattern recognition*, pages 5018–5027, 2017. 1
- [6] Dequan Wang, Evan Shelhamer, Shaoteng Liu, Bruno Olshausen, and Trevor Darrell. Tent: Fully test-time adaptation by entropy minimization. In *International Conference on Learning Representations*, 2021. 1
- [7] Qin Wang, Olga Fink, Luc Van Gool, and Dengxin Dai. Continual test-time domain adaptation. In *Proceedings of the IEEE/CVF Conference on Computer Vision and Pattern Recognition (CVPR)*, pages 7201–7211, June 2022. 1
- [8] Marvin Zhang, Sergey Levine, and Chelsea Finn. Memo: Test time robustness via adaptation and augmentation. *Advances in Neural Information Processing Systems*, 35:38629–38642, 2022. 1
